# Supplementary material for: Anti-Fatigue Activity of Aqueous Extracts of Sonchus arvensis L. in Exercise Trained Mice
Source: PubMed Central journal article supplement (PMC6470720; doi:10.3390/molecules24061168), 2019-03-25
Supplement: molecules-24-01168-s001.pdf [file molecules-24-01168-s001.pdf]

Supplemental Figure 1

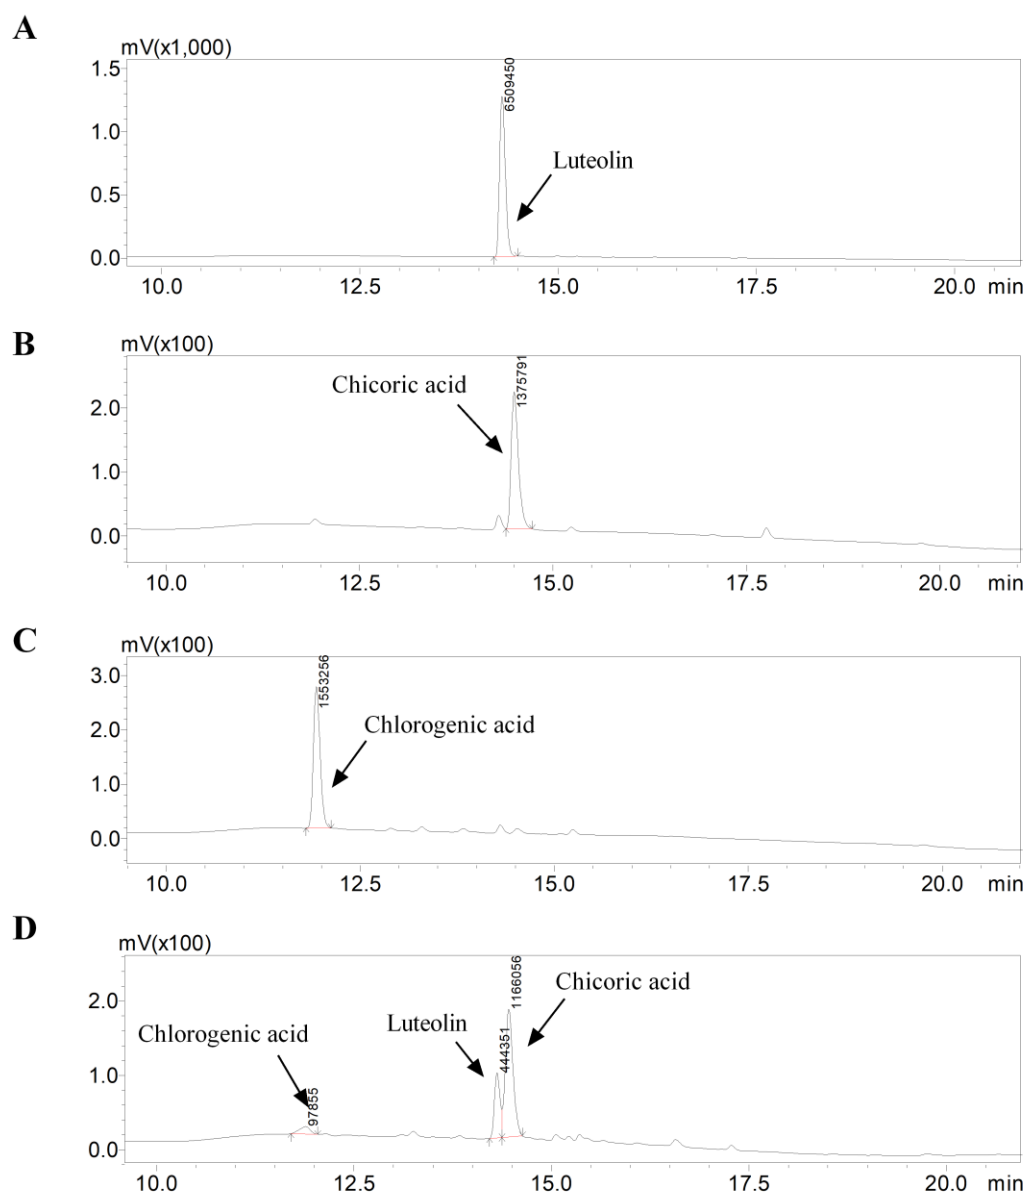

**Supplemental Figure 1** The representative HPLC chromatographic fingerprints of aqueous extracts of *Sonchus arvensis* L. (A) The chromatograms of standard luteolin; (B) The chromatograms of standard chicoric acid; (C) The chromatograms of standard chlorogenic acid; (D) The chromatograms of aqueous extracts of *Sonchus arvensis* L.
